# Supplementary material for: Zr-Based Biocomposite Materials as an Alternative for Fluoride Removal, Preparation and Characteristics
Source: MDPI journal article supplement (doi:10.3390/polym14081575), 2022-04-12
Supplement: s1 [file s1]

# Zr-Based Biocomposite Materials as an Alternative for Fluoride Removal, Preparation and Characteristics

Adriana Robledo-Peralta <sup>1</sup>, Linda Viviana García-Quinonez <sup>2</sup>, René I. Rodríguez-Beltrán <sup>2,\*</sup>  
and Liliana Reynoso-Cuevas <sup>3,\*</sup>

<sup>1</sup> Department of Sustainable Engineering, Advanced Materials Research Center (CIMAV-Durango), CIMAV 110 street, Ejido Arroyo Seco, Durango C.P. 34147, Durango, Mexico; adriana.robledo@cimav.edu.mx

<sup>2</sup> CONACYT-Centro de Investigación Científica y de Educación Superior de Ensenada, Unidad Foránea Monterrey, Alianza Centro 504, PIIT, Apodaca C.P. 66629, Nuevo León, Mexico; linda@cicese.mx

<sup>3</sup> Catedras CONACYT, Advanced Materials Research Center (CIMAV-Durango), CIMAV 110 Street, Ejido Arroyo Seco, Durango C.P. 34147, Durango, Mexico

\* Correspondence: rrodrigu@cicese.mx (R.I.R.-B.); liliana.reynoso@cimav.edu.mx (L.R.-C.)

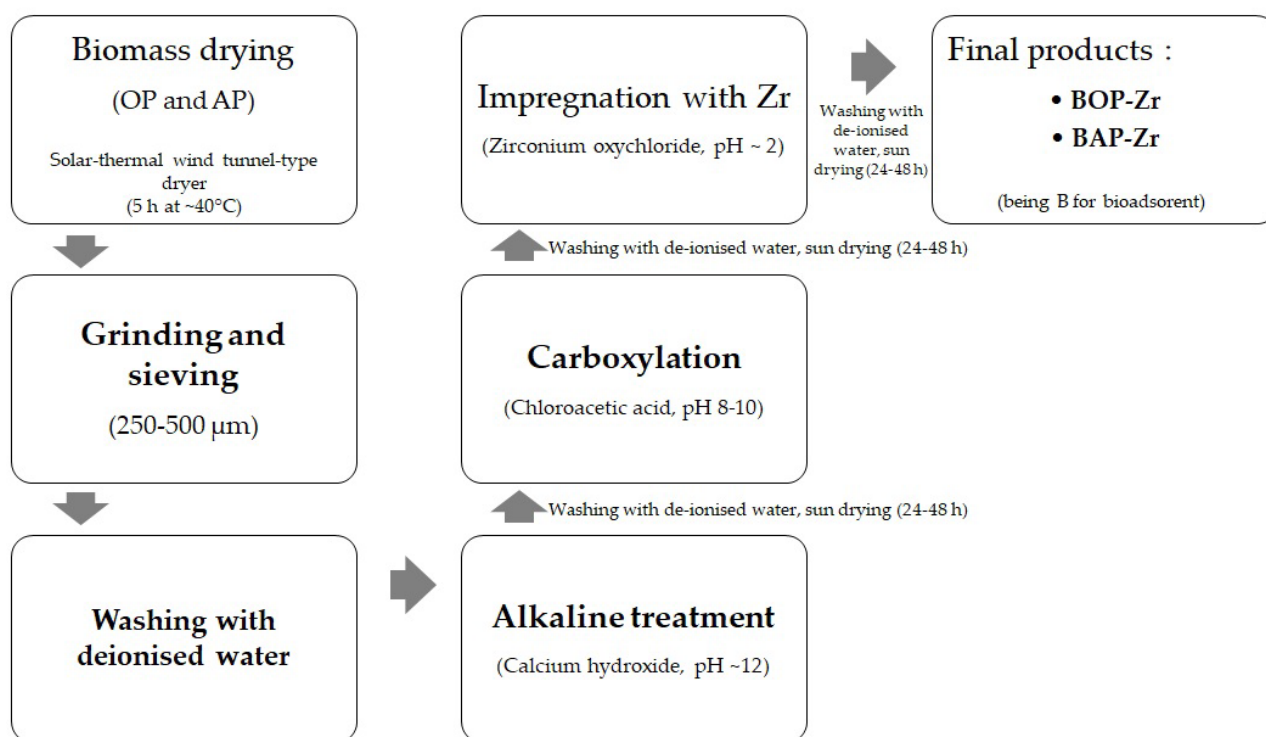

Figure S1. Bioadsorbent preparation process.

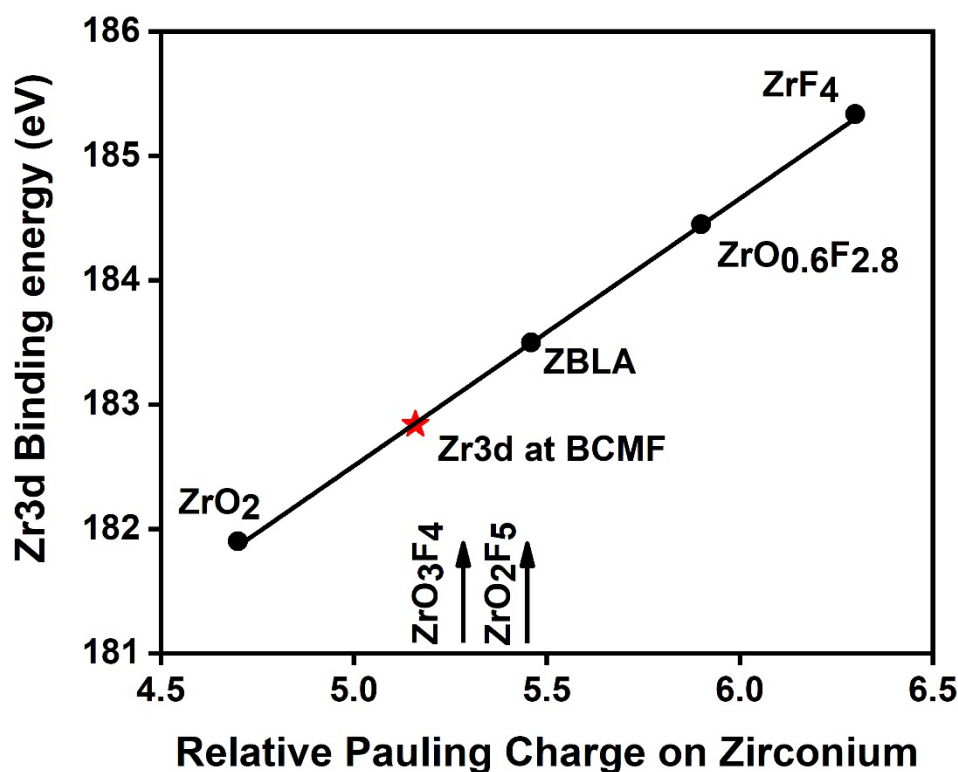

**Figure S2.** Relationship between the Zr3d binding energy and the Pauling charge in the Zr species of Pantano and Brow, 1988 [62] and of the present study ★.

**Table S1.** Summary of parameters analyzed by the BET method

| Sample | Surface area (m <sup>2</sup> /g) | Pore volume (cm <sup>3</sup> /g) | Pore size (nm) |
|--------|----------------------------------|----------------------------------|----------------|
| BOP-Zr | 0.751                            | 0.00141                          | 6.070          |
| BAP-Zr | 0.521                            | 0.00066                          | 5.060          |

**Table S2.** Physico-chemical characterization of groundwater from the state of Durango, México.

| Parameter                                               | Measured value |
|---------------------------------------------------------|----------------|
| pH                                                      | 8.7            |
| Electrical conductivity (µs/cm)                         | 548.25         |
| DQO (mg O <sub>2</sub> /L)                              | 104            |
| Na <sup>+</sup> (mg/L)                                  | 53.10          |
| K <sup>+</sup> (mg/L)                                   | 9.88           |
| Ca <sup>+2</sup> (mg/L)                                 | 60.55          |
| Mg <sup>+2</sup> (mg/L)                                 | 1.54           |
| F <sup>-</sup> (mg/L)                                   | 3.89           |
| NO <sub>3</sub> <sup>-</sup> (mg/L)                     | 38.36          |
| NO <sub>2</sub> <sup>-</sup> (mg/L)                     | 1.84           |
| Cl <sup>-</sup> (mg/L)                                  | 26.39          |
| CO <sub>3</sub> <sup>-2</sup> (mg/L)                    | 0              |
| HCO <sub>3</sub> <sup>-</sup> (mg CaCO <sub>3</sub> /L) | 148.50         |
| SO <sub>4</sub> <sup>-2</sup> (mg/L)                    | 59.76          |
| As Total (mg/L)                                         | 0.032          |
| As Total=As <sup>+5</sup> +As <sup>+3</sup>             |                |

**Table S3.** Peak Deconvolution peaks on bioadsorbents before and after adsorption.

| Species                             | Peak's binding energy (Ev) |           |        |          | Area CPS.Ev |          |          |          |
|-------------------------------------|----------------------------|-----------|--------|----------|-------------|----------|----------|----------|
|                                     | BOP-Zr                     | BOP-Zr-F  | BAP-Zr | BAP-Zr-F | BOP-Zr      | BOP-Zr-F | BAP-Zr   | BAP-Zr-F |
| <b>C1s</b><br>(C-C, C-H)            | 284.75                     | 284.72    | 284.80 | 284.75   | 6738.19     | 7211.94  | 14292.11 | 9897.90  |
| <b>C1s</b><br>(C-O-C, C-OH)         | 286.12                     | 286.36    | 286.52 | 286.10   | 4183.31     | 6444.94  | 1430.80  | 3315.20  |
| <b>C1s</b><br>(C=O)                 | 287.70                     | 288.11    | 288.80 | 288.37   | 2948.47     | 3419.43  | 309.94   | 675.61   |
| <b>O1s</b><br>(O <sup>2-</sup> )    | 530.30                     | Disappear | 529.91 | 529.80   | 541.40      | -        | 98.97    | 341.51   |
| <b>O1s</b><br>(OH <sup>-</sup> )    | 532.50                     | 532.65    | 532.35 | 532.42   | 10747.82    | 13943.75 | 3452.99  | 6268.26  |
| <b>O1s</b><br>(H <sub>2</sub> O)    | 534.63                     | Disappear | 534.18 | 534.40   | 858.92      | -        | 145.58   | 159.04   |
| <b>O1s</b><br>(O-Fx)                | -                          | 535.23    | -      | -        | -           | 1191.43  | -        | -        |
| <b>Zr3d<sub>5/2</sub></b>           | 182.84                     | 182.87    | 182.63 | 182.84   | 1713.71     | 1646.20  | 404.64   | 952.61   |
| <b>Zr3d<sub>5/2</sub></b>           | 184.85                     | 184.79    | 184.85 | 185.08   | 1196.70     | 1030.79  | 215.57   | 474.95   |
| <b>Zr3d<sub>3/2</sub></b>           | 185.53                     | 185.54    | 185.00 | 185.41   | 521.89      | 709.44   | 148.36   | 150.17   |
| <b>Zr3d<sub>3/2</sub></b>           | 186.94                     | 187.04    | 186.73 | 185.35   | 242.20      | 523.78   | 47.05    | 103.35   |
| <b>ZrF<sub>4</sub></b>              | -                          | 685.0     | -      | 685.49   | -           | 327.71   | -        | 205.39   |
| <b>ZrO<sub>3</sub>F<sub>4</sub></b> | -                          | 689.77    | -      | 689.43   | -           | 467.44   | -        | 268.61   |
